# Supplementary material
Source: publisher figshare collection journal article supplement (https://frontiersin.figshare.com/ndownloader/files/17935943)
Supplement: Supplementary file 1 [file 17935943]

# Supplementary Material

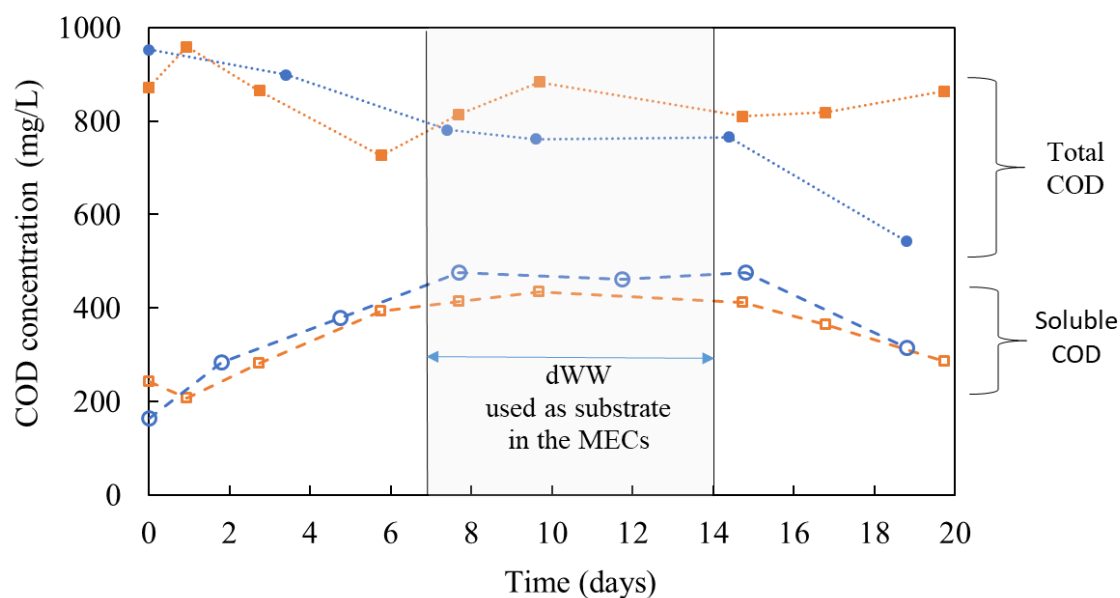

Supplementary Figure 1: Total and soluble COD concentration evolution of domestic wastewater in anoxic conditions, 2 replicates.

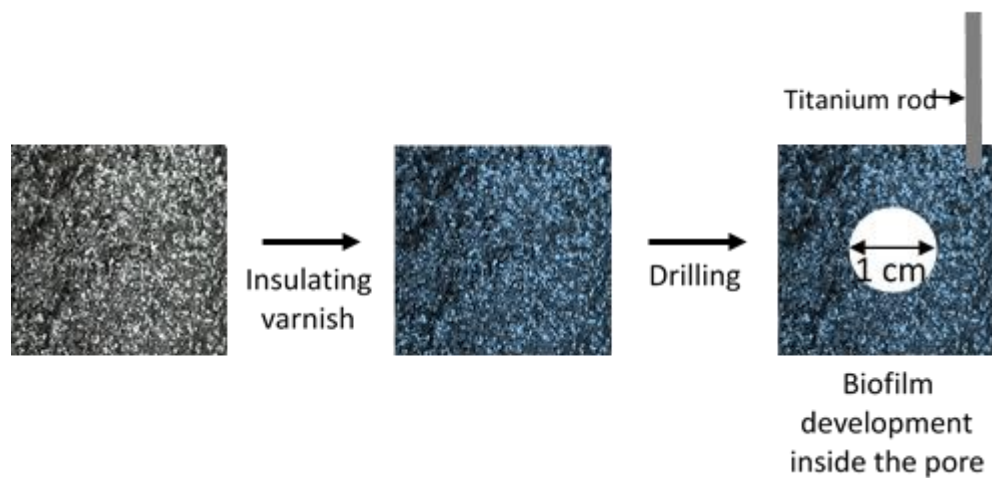

Supplementary Figure 2: Graphite electrodes preparation strategy for internal biofilm development
